# Supplementary material for: Aptamer based surface enhanced Raman scattering detection of adenosine using various core sizes of Au–Ag core–shell nanoparticles
Source: Royal Society of Chemistry journal article supplement (doi:10.1039/c4ra02762k), 2014-01-01
Supplement: c4ra02762k1.pdf [file c4ra02762k1.pdf]

## Supporting Information:

### Aptamer based surface enhanced Raman scattering detection of adenosine using various core sizes of Au-Ag core-shell nanoparticles

*Fu-Hsiang Ko*<sup>a</sup> and *Yu-Cheng Chang*<sup>b\*</sup>

<sup>a</sup> Department of Materials Science and Engineering, National Chiao Tung University, Hsinchu, 30010, Taiwan and <sup>b</sup> Department of Materials Science and Engineering, Feng Chia University, Taichung, 40724, Taiwan

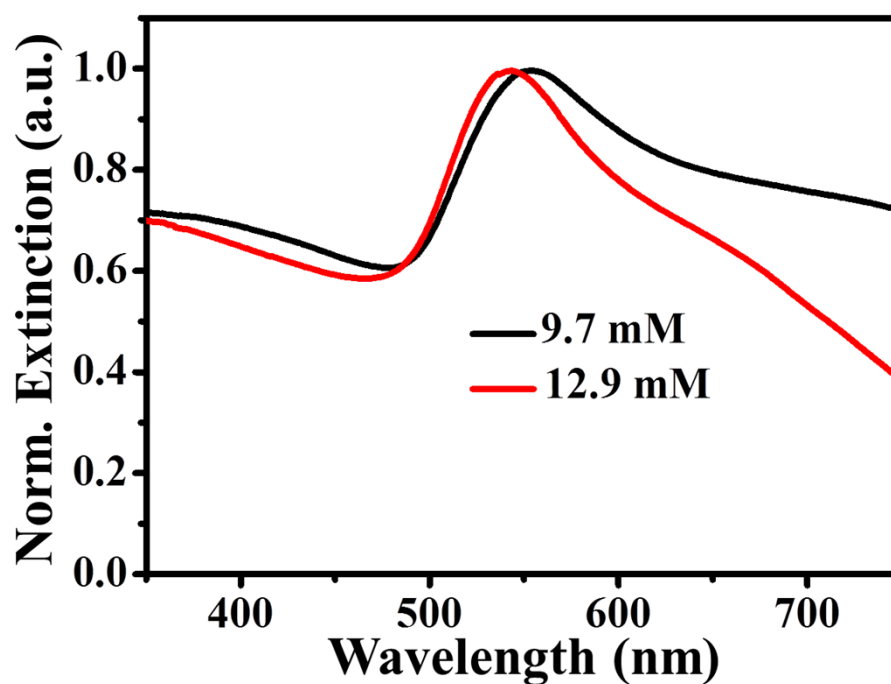

**Figure S1.** UV-vis spectra of Au NPs grown with 9.7 mM and 12.9 mM citrate solution, respectively.

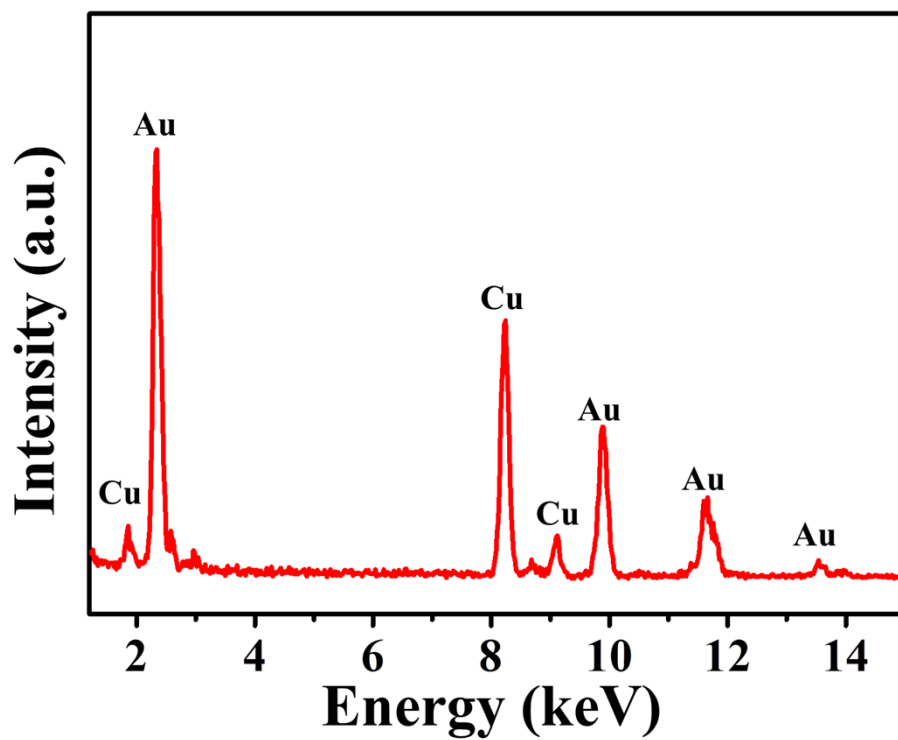

Figure S2. The EDS spectrum of Au NP.

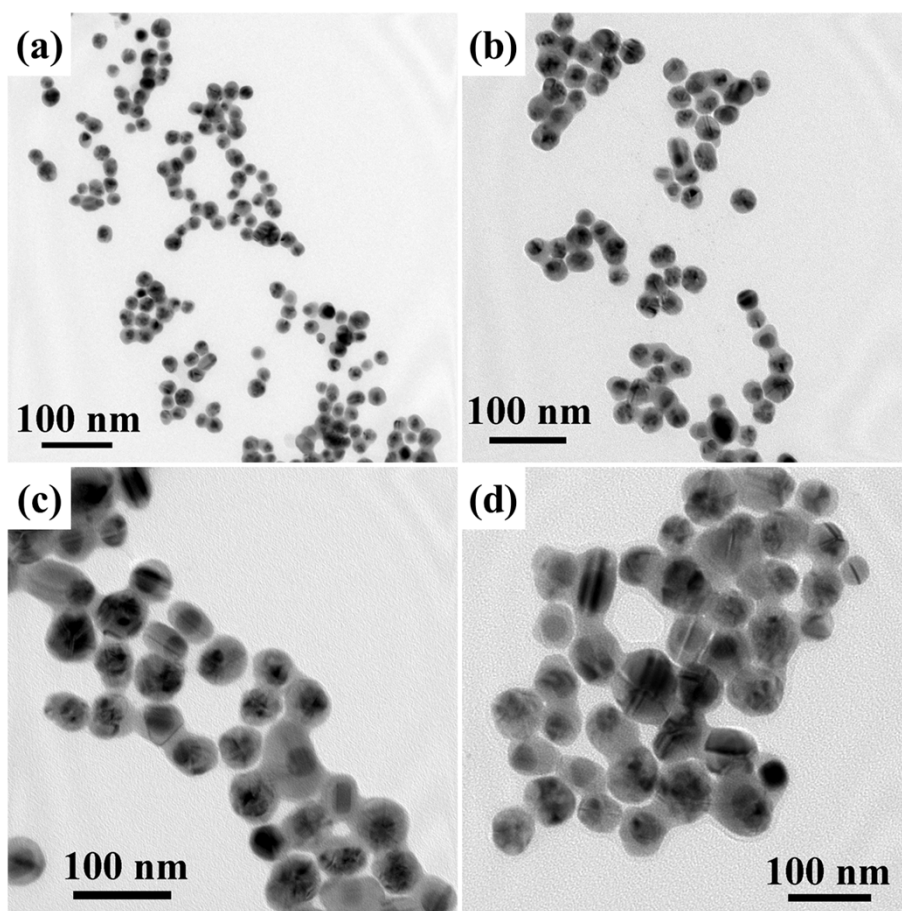

**Figure S3.** Low magnification TEM images of Au-Ag core-shell NPs synthesized on the different sizes of Au NP: (a) 13.1 nm, (b) 18.7 nm, (c) 23.4 nm, and (d) 29.5 nm.

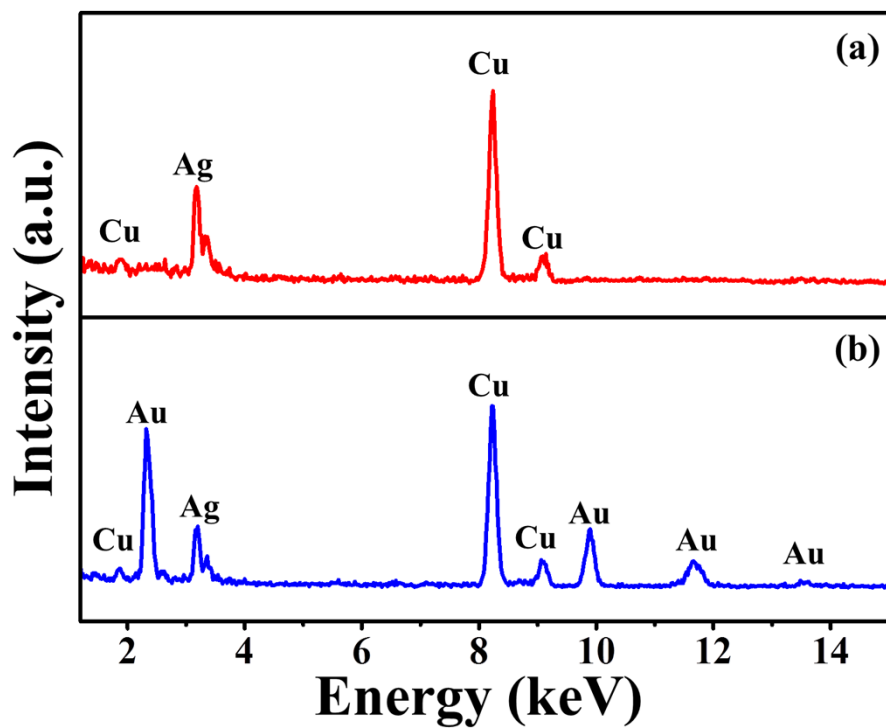

**Figure S4.** The EDS spectra of the a) side and b) center of Au-Ag core-shell NP.

| <b>Au NP Sizes (nm)</b> | <b>Average Diameters (nm)</b>  | <b>Self-Assembly Time (min)</b> | <b>Density (<math>\mu\text{m}^2</math>)</b> | <b>Surface Coverage (%)</b> |
|-------------------------|--------------------------------|---------------------------------|---------------------------------------------|-----------------------------|
| <b>13.1</b>             | <b>12.2<math>\pm</math>1.8</b> | <b>15</b>                       | <b>2356</b>                                 | <b>27.5</b>                 |
| <b>18.7</b>             | <b>17.5<math>\pm</math>2.7</b> | <b>30</b>                       | <b>1164</b>                                 | <b>24.9</b>                 |
| <b>23.4</b>             | <b>20.1<math>\pm</math>3.5</b> | <b>60</b>                       | <b>723</b>                                  | <b>22.9</b>                 |
| <b>29.5</b>             | <b>26.8<math>\pm</math>5.1</b> | <b>100</b>                      | <b>396</b>                                  | <b>22.3</b>                 |

**Table S1.** Average diameters and self-assembly conditions for the different sizes of Au NPs.

| <b>Core Sizes of Au-Ag Core-Shell NP (nm)</b> | <b>Average Diameters (nm)</b>  | <b>Self-Assembly Time (min)</b> | <b>Density (<math>\mu\text{m}^2</math>)</b> | <b>Surface Coverage (%)</b> |
|-----------------------------------------------|--------------------------------|---------------------------------|---------------------------------------------|-----------------------------|
| <b>13.1</b>                                   | <b>23.4<math>\pm</math>3.3</b> | <b>45</b>                       | <b>641</b>                                  | <b>27.6</b>                 |
| <b>18.7</b>                                   | <b>30.9<math>\pm</math>5.5</b> | <b>75</b>                       | <b>336</b>                                  | <b>25.2</b>                 |
| <b>23.4</b>                                   | <b>38.4<math>\pm</math>5.6</b> | <b>120</b>                      | <b>207</b>                                  | <b>24.0</b>                 |
| <b>29.5</b>                                   | <b>52.1<math>\pm</math>8.2</b> | <b>180</b>                      | <b>105</b>                                  | <b>22.4</b>                 |

**Table S2.** Average diameters and self-assembly conditions for the different core sizes of Au-Ag core-shell NPs.

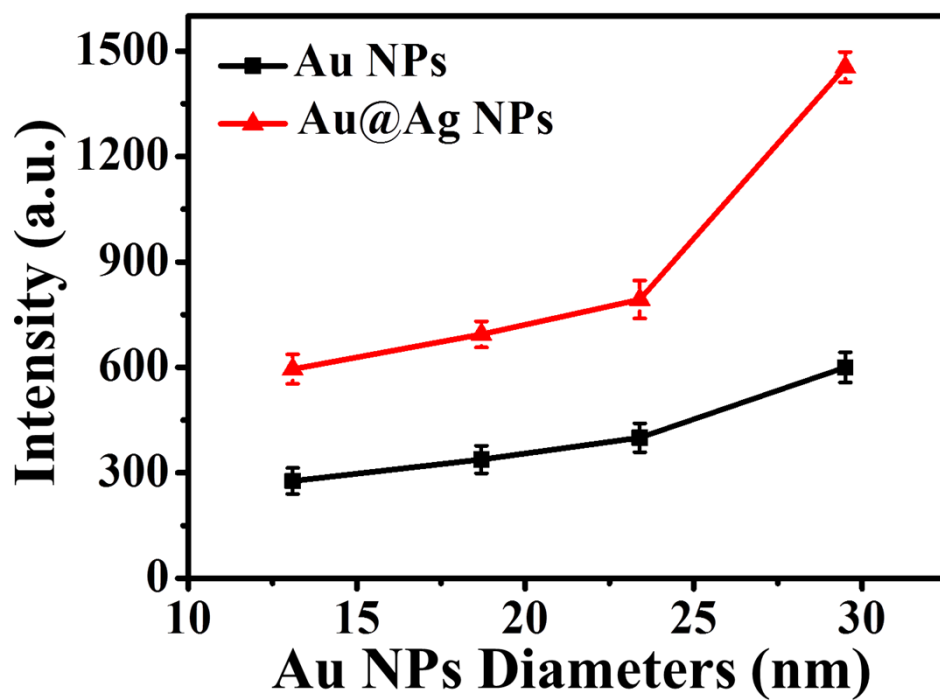

**Figure S5.** The maximum SERS intensity at  $1646\text{ cm}^{-1}$  versus the different sizes of Au NPs.

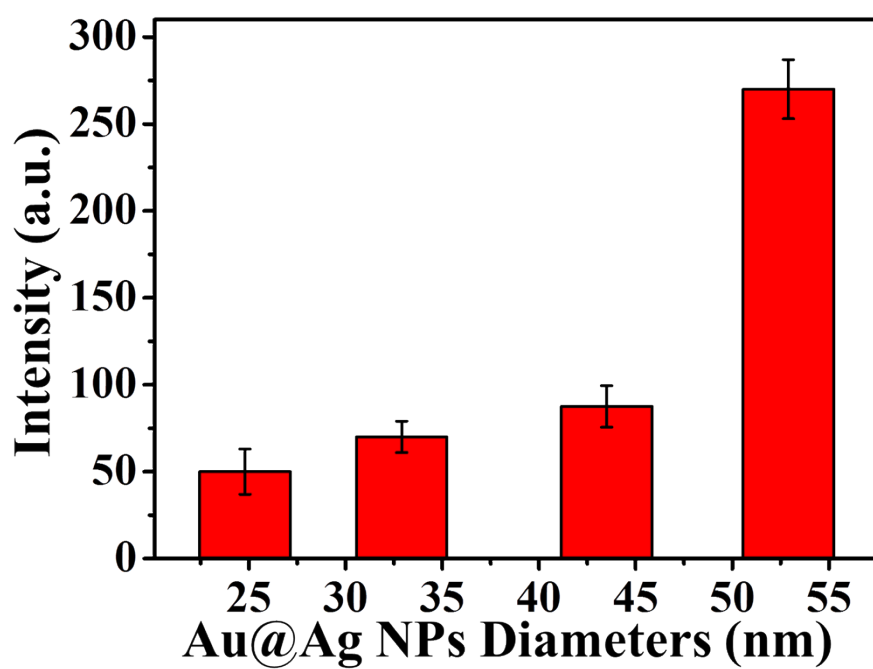

**Figure S6.** The SERS signals of the aptameric sensor at  $1648\text{ cm}^{-1}$  versus the different sizes of Au-Ag core-shell NPs.

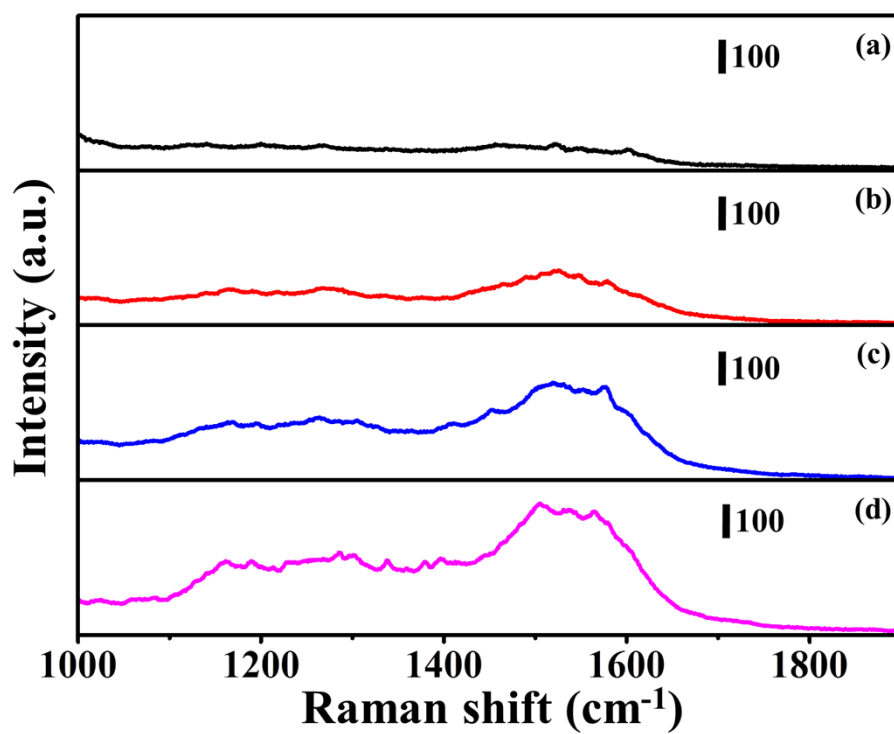

**Figure S7.** SERS spectra of the aptameric sensor on the silicon substrate with self-assembled the different sizes of Au NPs at  $1 \times 10^{-4}$  M adenosine: (a) 13.1, (b) 18.7 (c) 23.5 and (d) 29.5 nm.



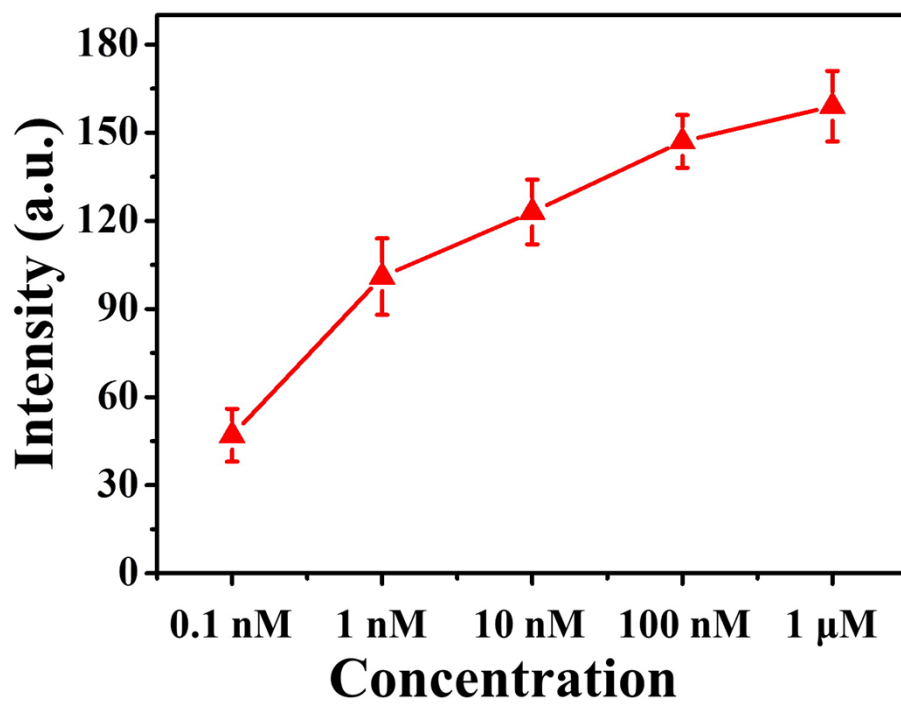

**Figure S8.** The SERS signals of the aptameric sensor at 1648 cm<sup>-1</sup> versus the concentration of adenosine.
